# Supplementary material
Source: publisher figshare collection journal article supplement (https://plos.figshare.com/articles/dataset/_/7043780)

Prototypical STARD diagram to report flow of participants through the study

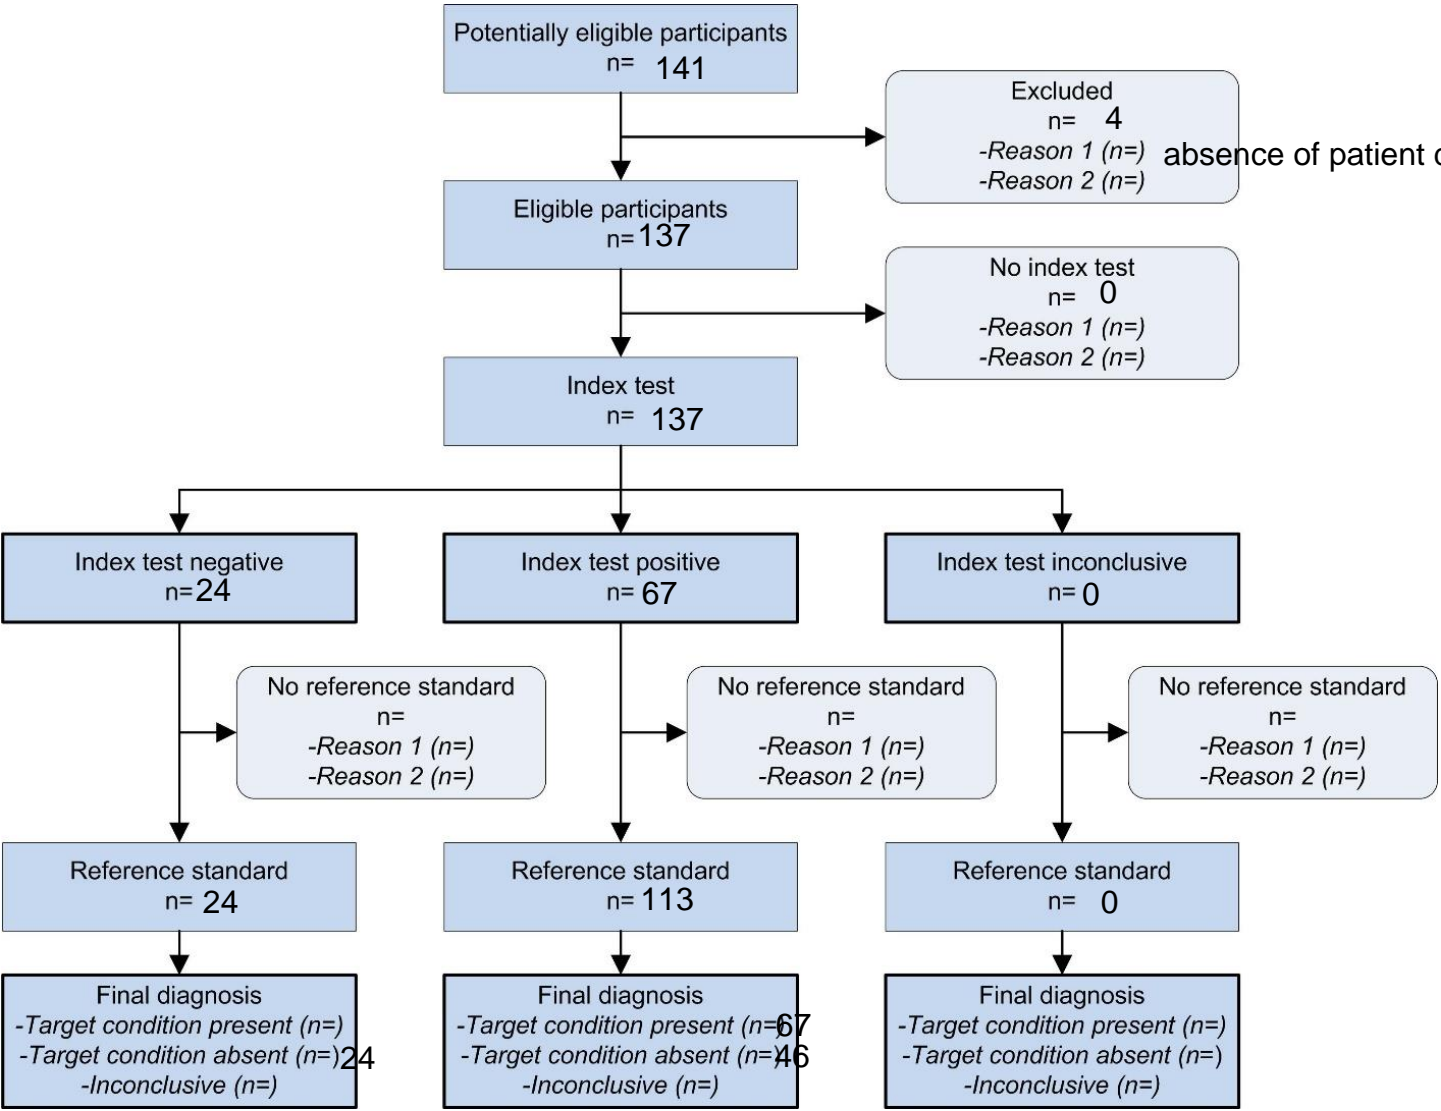

Supplement: Supplementary file [file 1]
